# Supplementary material for: Causal relationship between serum uric acid and cardiovascular disease: a Mendelian randomization study
Source: Research Square preprint supplement (doi:10.21203/rs.3.rs-4170524/v1), 2024-04-09
Supplement: Supplementary file 1 [file 268595317864e5dd76483367.pdf]

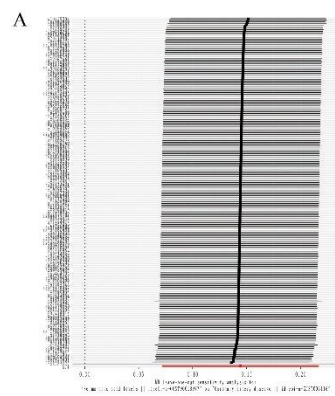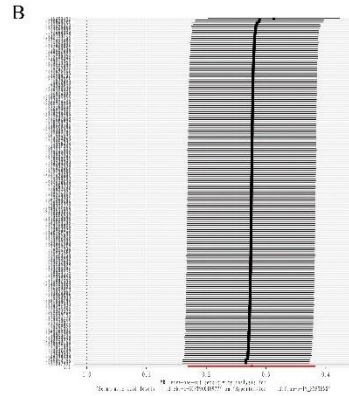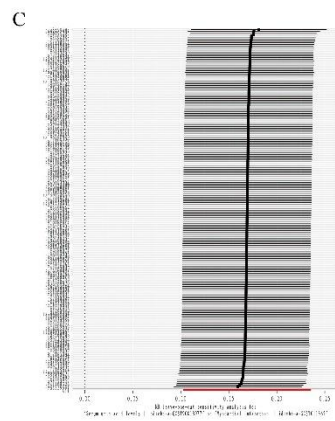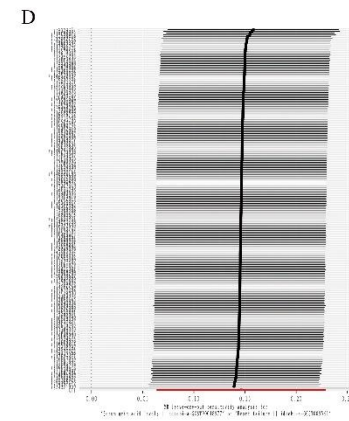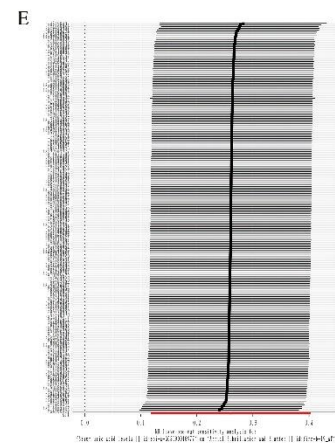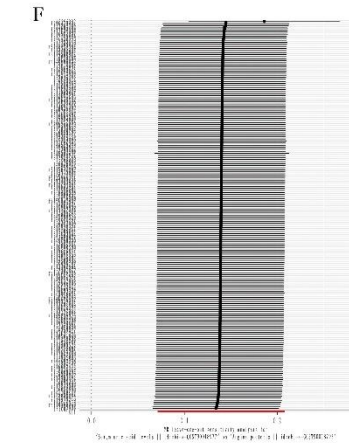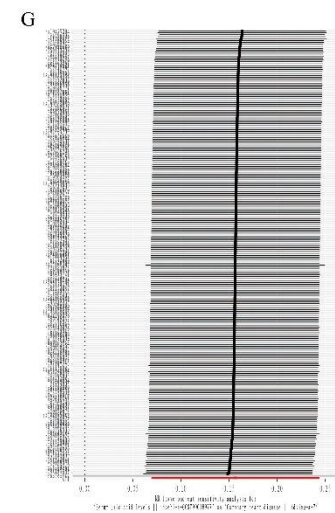

**Figure S3** Forest map of the analysis results using the "leave one out". (A) Leave-one -out analysis plots for serum uric acid on the risk of coronary artery disease. (B) Leave-one-out analysis plots for serum uric acid on the risk of hypertension. (C)Leave-one-out analysis plots for serum uric acid on the risk of myocardial infarction. (D) Leave-one-out analysis plots for serum uric acid on the risk of heart failure. (E) Leave-one-out analysis plots for serum uric acid on the risk of atrial fibrillation. (F) Leave-one-out analysis plots for serum uric acid on the risk of angina. (G) Leave-one-out analysis plots for serum uric acid on the risk of coronary heart disease.
