# Supplementary material for: Causal relationship between serum uric acid and cardiovascular disease: a Mendelian randomization study
Source: Research Square preprint supplement (doi:10.21203/rs.3.rs-4170524/v1), 2024-04-09
Supplement: Supplementary file 2 [file 31d7e9e354e49889c5e45191.pdf]

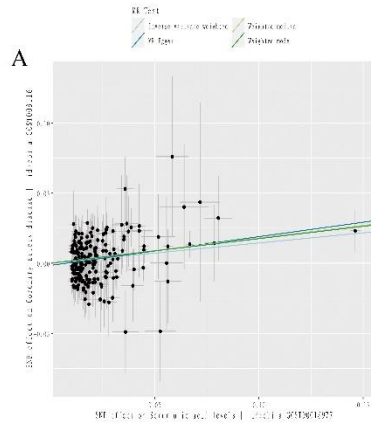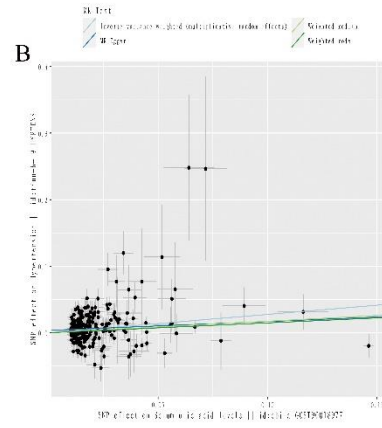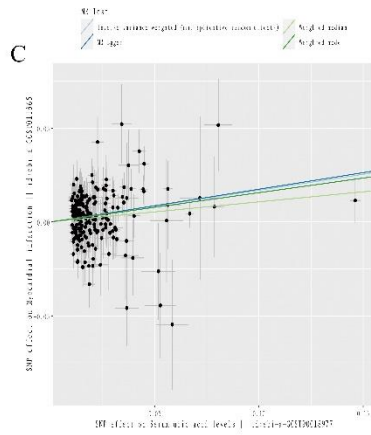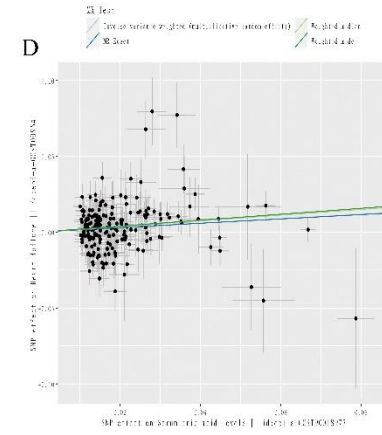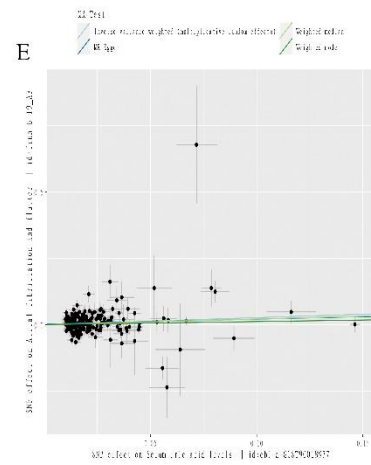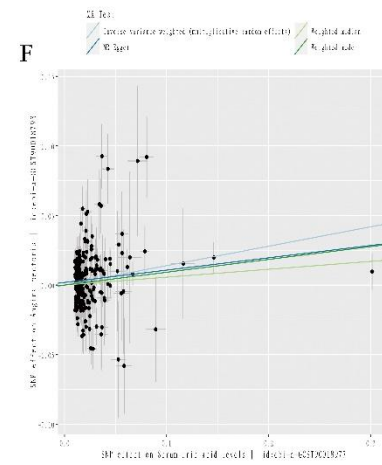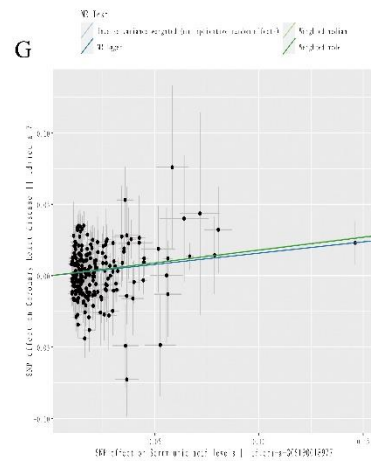

**Figure S2** Scatter plots of serum uric acid on cardiovascular disease. (A) Scatter plots of serum uric acid on coronary artery disease. (B) Scatter plots of serum uric acid on hypertension. (B) Scatter plots of serum uric acid on myocardial infarction. (D) Scatter plots of serum uric acid on heart failure. (E) Scatter plots of serum uric acid on atrial fibrillation. (F) Scatter plots of serum uric acid on angina. (F) Scatter plots of serum uric acid on coronary heart disease.
