# Supplementary material for: Causal relationship between serum uric acid and cardiovascular disease: a Mendelian randomization study
Source: Research Square preprint supplement (doi:10.21203/rs.3.rs-4170524/v1), 2024-04-09
Supplement: Supplementary file 3 [file 88648a9be96d692bb9666198.pdf]

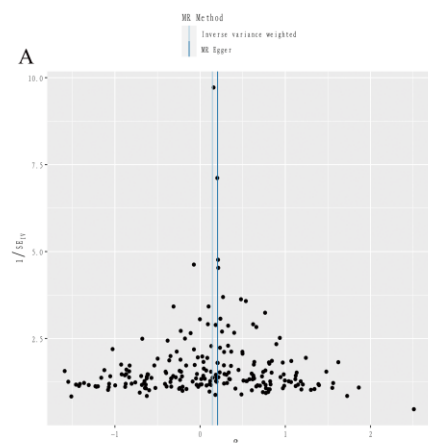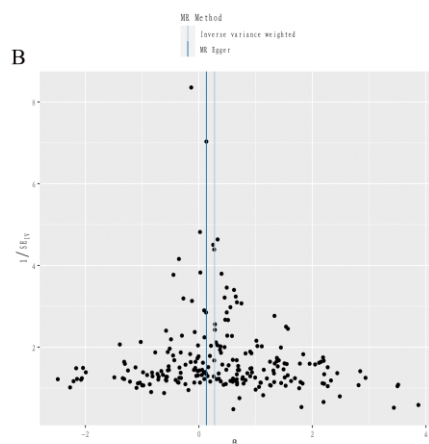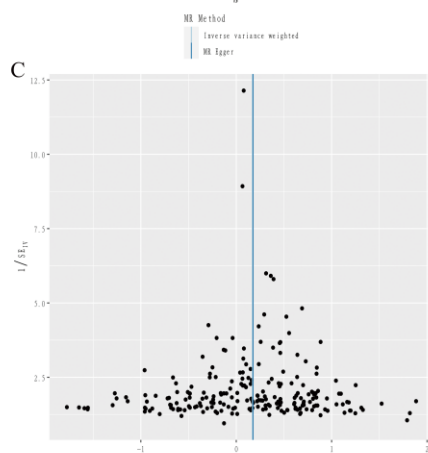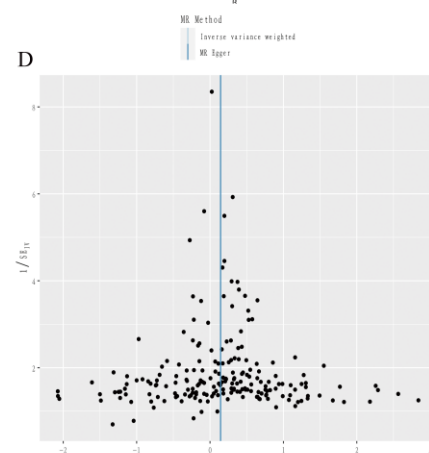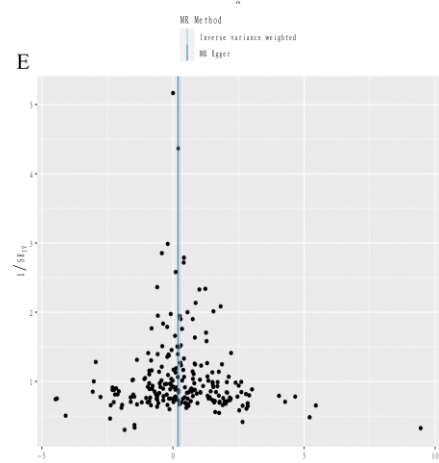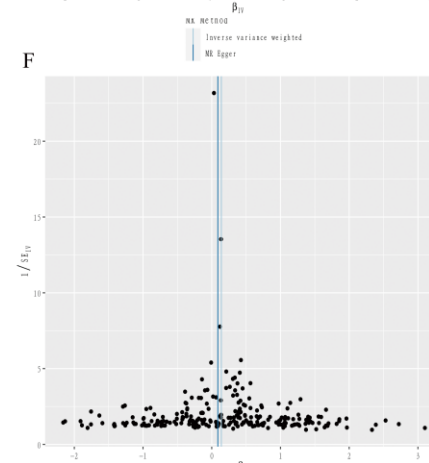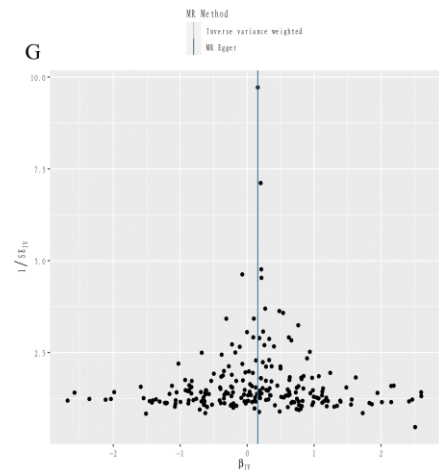

**Figure S1** Funnel plots to the causal association of serum uric acid on cardiovascular disease. (A) Funnel plot of the causal effect of serum uric acid on coronary artery disease. (B) Funnel plot of the causal effect of serum uric acid on hypertension. (C) Funnel plot of the causal effect of serum uric acid on myocardial infarction. (D) Funnel plot of the causal effect of serum uric acid on heart failure. (E) Funnel plot of the causal effect of serum uric acid on atrial fibrillation. (F) Funnel plot of the causal effect of serum uric acid on angina. (G) Funnel plot of the causal effect of serum uric acid on coronary heart disease.
